# Supplementary material
Source: HighWire-hosted journal article supplement (https://cmaj.ca/highwire/filestream/57943/field_highwire_adjunct_files/0/in-koelewijn-1-at.pdf)
Supplement: in-koelewijn-1-at.pdf [file in-koelewijn-1-at.pdf]

| Time line           | Intervention group | Control group |
|---------------------|--------------------|---------------|
| Randomisation       |                    |               |
|                     | (A) (B)            | (A)           |
| Baseline (T 0)      | (C) [D] [E]        | (C) [D] [E]   |
| Intervention        |                    |               |
| First consultation  | [F] (G) [H]        | [F] (I)       |
| Second consultation | (J)                |               |
| Telephone call      | (K)                |               |
|                     | [L]                | [L]           |
| 12 weeks (T1)       | [D]                | [D]           |
| 52 weeks (T2)       | [D] [M]            | [D] [M]       |

|     |                                                                                                                                                                                             |
|-----|---------------------------------------------------------------------------------------------------------------------------------------------------------------------------------------------|
| (A) | Nurses trained (2 hours) in Dutch national guideline for cardiovascular risk management (CVRM) and in identification of patients for a risk assessment                                      |
| (B) | Nurses trained (2 days) in risk communication, use of risk communication tool, handing over a decision aid and using adapted Motivational Interviewing                                      |
| (C) | Recruitment of patients by GP or practice nurse                                                                                                                                             |
| [D] | Completion of questionnaire by patient (At T0: handed over to patient at recruitment. At T1 and T2: sent to patient's home address)                                                         |
| [E] | Completion of informed consent form by patient (handed over to patient at recruitment)                                                                                                      |
| [F] | Completion of patient's cardiovascular risk profile by nurse during first consultation                                                                                                      |
| (G) | Nurse explains cardiovascular risk to patient                                                                                                                                               |
| [H] | Nurse hands over decision aid and invites patient for second consultation                                                                                                                   |
| (I) | Nurse applies usual care                                                                                                                                                                    |
| (J) | In a second consultation (approx. 2 weeks after first), the nurse discusses the risk and possible options for risk reduction with the patient by means of adapted motivational interviewing |
| (K) | Telephone call (approx. 2 weeks after second consultation) in which nurse discusses options for risk reduction by means of adapted motivational interviewing                                |
| [L] | After the consultations, the nurses complete the recording form about the consultations (for process evaluation) and about the patient's risk profile; both are sent to researchers         |
| [M] | Most recent cardiovascular risk data derived from nurses.                                                                                                                                   |

**Appendix 1 (as supplied by the authors):** Schematic outline of the intervention and measurement, with legend. Squares reflect the fixed elements, e.g. objects and calculations. Circles reflect the activities that are flexible. Grey shading refers to the randomisation and measurements. Graphical method proposed by Perera et al <sup>48</sup>.
